# Supplementary material for: Cross-Resistance of UV- or Chlorine Dioxide-Resistant Echovirus 11 to Other Disinfectants
Source: PubMed Central journal article supplement (PMC5632658; doi:10.3389/fmicb.2017.01928), 2017-10-04
Supplement: Image2.pdf [file Image2.pdf]

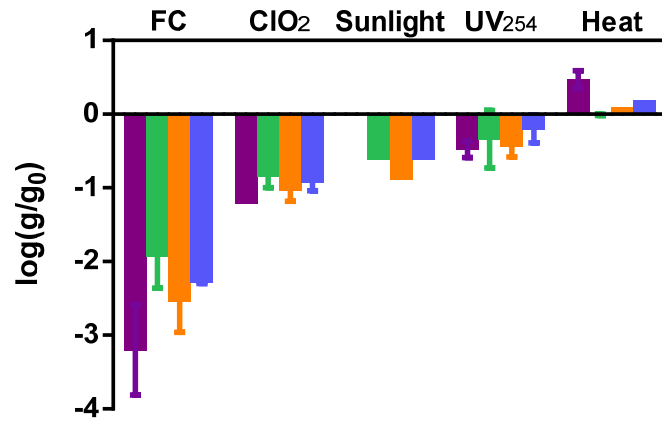

**Supplementary Figure 2.** Decay of four genome segments ( $\log(g/g_0)$ ) upon inactivation by FC, ClO<sub>2</sub>, sunlight, UV<sub>254</sub> and heat. Segment 1 was not tested for decay by sunlight. Error bars represent the standard deviation of triplicate experiments.
